CORRECTION

# Correction: Bessel statistical convergence: New concepts and applications in sequence theory

Ibrahim S. Ibrahim, Majeed A. Yousif, Pshtiwan Othman Mohammed, Dumitru Baleanu, Ahmad Zeeshan, Mohamed Abdelwahed

The Funding statement for this article is incorrect. The correct Funding statement is as follows: Researchers Supporting Project number (RSP2024R136), King Saud University, Riyadh, Saudi Arabia.

## Reference

1. Ibrahim IS, Yousif MA, Mohammed PO, Baleanu D, Zeeshan A, Abdelwahed M. Bessel statistical convergence: New concepts and applications in sequence theory. PLoS One. 2024;19(11):e0313273. <https://doi.org/10.1371/journal.pone.0313273> PMID: [39541359](https://pubmed.ncbi.nlm.nih.gov/39541359/)

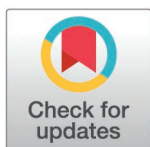

## OPEN ACCESS

**Citation:** Ibrahim IS, Yousif MA, Mohammed PO, Baleanu D, Zeeshan A, Abdelwahed M (2025) Correction: Bessel statistical convergence: New concepts and applications in sequence theory. PLoS One 20(8): e0329900. <https://doi.org/10.1371/journal.pone.0329900>

**Published:** August 5, 2025

**Copyright:** © 2025 Ibrahim et al. This is an open access article distributed under the terms of the [Creative Commons Attribution License](https://creativecommons.org/licenses/by/4.0/), which permits unrestricted use, distribution, and reproduction in any medium, provided the original author and source are credited.
